# Supplementary material for: A Retrospective Analysis of Salmonella Isolates across 11 Animal Species (1982–1999) Led to the First Identification of Chromosomally Encoded blaSCO-1 in the USA
Source: MDPI journal article supplement (doi:10.3390/microorganisms12030528), 2024-03-06
Supplement: s1 [file s1]

**Table S1: Frequency of distribution of *Salmonella* serovars (n = 251) across 11 animal host species**

| Serovars (number of the isolates) | Number of isolates per animal host species |        |        |      |        |        |       |       |         |         |      |
|-----------------------------------|--------------------------------------------|--------|--------|------|--------|--------|-------|-------|---------|---------|------|
|                                   | Avian                                      | Bovine | Canine | Deer | Equine | Feline | llama | Ovine | Porcine | Reptile | Rhea |
| Agona (18)                        | 0                                          | 7      | 0      | 0    | 11     | 0      | 0     | 0     | 0       | 0       | 0    |
| Amsterdam (1)                     | 0                                          | 0      | 0      | 0    | 1      | 0      | 0     | 0     | 0       | 0       | 0    |
| Anatum (23)                       | 0                                          | 13     | 0      | 0    | 10     | 0      | 0     | 0     | 0       | 0       | 0    |
| Berta (3)                         | 0                                          | 0      | 0      | 2    | 1      | 0      | 0     | 0     | 0       | 0       | 0    |
| Braenderup (2)                    | 0                                          | 0      | 0      | 0    | 2      | 0      | 0     | 0     | 0       | 0       | 0    |
| Cerro (1)                         | 0                                          | 0      | 0      | 0    | 1      | 0      | 0     | 0     | 0       | 0       | 0    |
| Choleraesuis (3)                  | 0                                          | 0      | 0      | 0    | 0      | 0      | 0     | 0     | 3       | 0       | 0    |
| Dublin (21)                       | 0                                          | 21     | 0      | 0    | 0      | 0      | 0     | 0     | 0       | 0       | 0    |
| Enteritidis (6)                   | 0                                          | 1      | 1      | 0    | 2      | 0      | 0     | 2     | 0       | 0       | 0    |
| Florida (1)                       | 0                                          | 0      | 0      | 0    | 1      | 0      | 0     | 0     | 0       | 0       | 0    |
| Give (8)                          | 0                                          | 7      | 0      | 0    | 1      | 0      | 0     | 0     | 0       | 0       | 0    |
| Havana (2)                        | 0                                          | 0      | 0      | 0    | 1      | 1      | 0     | 0     | 0       | 0       | 0    |
| I 4,[5],12:i:- (3)                | 0                                          | 1      | 0      | 0    | 2      | 0      | 0     | 0     | 0       | 0       | 0    |
| I 47:z4,z23:- (1)                 | 0                                          | 1      | 0      | 0    | 0      | 0      | 0     | 0     | 0       | 0       | 0    |
| IIIa -:z4,z23:- (1)               | 0                                          | 0      | 0      | 0    | 1      | 0      | 0     | 0     | 0       | 0       | 0    |
| IIIb 48:l,v:1,5,(7) (1)           | 0                                          | 0      | 0      | 0    | 0      | 0      | 0     | 0     | 0       | 1       | 0    |
| Infantis (2)                      | 0                                          | 1      | 1      | 0    | 0      | 0      | 0     | 0     | 0       | 0       | 0    |
| Javiana (2)                       | 0                                          | 0      | 0      | 0    | 2      | 0      | 0     | 0     | 0       | 0       | 0    |
| Lexington (1)                     | 0                                          | 1      | 0      | 0    | 0      | 0      | 0     | 0     | 0       | 0       | 0    |
| Lille (1)                         | 0                                          | 0      | 0      | 0    | 1      | 0      | 0     | 0     | 0       | 0       | 0    |
| Mbandaka (8)                      | 0                                          | 5      | 0      | 0    | 3      | 0      | 0     | 0     | 0       | 0       | 0    |
| Meleagridis (5)                   | 0                                          | 5      | 0      | 0    | 0      | 0      | 0     | 0     | 0       | 0       | 0    |
| Montevideo (4)                    | 0                                          | 0      | 0      | 0    | 4      | 0      | 0     | 0     | 0       | 0       | 0    |
| Muenchen (7)                      | 0                                          | 0      | 1      | 0    | 6      | 0      | 0     | 0     | 0       | 0       | 0    |
| Muenster (8)                      | 0                                          | 0      | 1      | 0    | 7      | 0      | 0     | 0     | 0       | 0       | 0    |

|                    |          |            |           |          |            |          |          |          |          |          |          |
|--------------------|----------|------------|-----------|----------|------------|----------|----------|----------|----------|----------|----------|
| Newport (11)       | 1        | 2          | 0         | 0        | 6          | 1        | 1        | 0        | 0        | 0        | 0        |
| Nottingham (1)     | 0        | 0          | 0         | 0        | 1          | 0        | 0        | 0        | 0        | 0        | 0        |
| Nyanza (1)         | 0        | 0          | 0         | 0        | 0          | 0        | 0        | 0        | 0        | 1        | 0        |
| Oranienburg (1)    | 0        | 0          | 0         | 0        | 1          | 0        | 0        | 0        | 0        | 0        | 0        |
| Saintpaul (2)      | 0        | 0          | 0         | 0        | 2          | 0        | 0        | 0        | 0        | 0        | 0        |
| Schwarzengrund (1) | 1        | 0          | 0         | 0        | 0          | 0        | 0        | 0        | 0        | 0        | 0        |
| Senftenberg (2)    | 0        | 1          | 0         | 0        | 0          | 1        | 0        | 0        | 0        | 0        | 0        |
| Tennessee (3)      | 0        | 0          | 0         | 0        | 1          | 0        | 0        | 0        | 0        | 0        | 2        |
| Typhimurium (91)   | 2        | 34         | 6         | 1        | 45         | 0        | 0        | 0        | 2        | 0        | 1        |
| Uganda (2)         | 0        | 2          | 0         | 0        | 0          | 0        | 0        | 0        | 0        | 0        | 0        |
| Worthington (3)    | 0        | 0          | 0         | 0        | 3          | 0        | 0        | 0        | 0        | 0        | 0        |
| <b>Total (251)</b> | <b>4</b> | <b>102</b> | <b>10</b> | <b>3</b> | <b>116</b> | <b>3</b> | <b>1</b> | <b>2</b> | <b>5</b> | <b>2</b> | <b>3</b> |

**Table S2. Antimicrobial susceptibility profile of *Salmonella* isolates (n=251) in this study**

| Antibiotics                   | Abbreviation | Phenotype      |                  |                 |
|-------------------------------|--------------|----------------|------------------|-----------------|
|                               |              | Resistance (%) | Intermediate (%) | Susceptible (%) |
| Ampicillin                    | AMP          | 79 (31.5)      | 0 (0.0)          | 172 (68.5)      |
| Doxycycline                   | DOX          | 64 (25.5)      | 1 (0.4)          | 186 (74.1)      |
| Gentamicin                    | GEN          | 33 (13.1)      | 0 (0.0)          | 218 (86.9)      |
| Trimethoprim/sulfamethoxazole | SXT          | 25 (10.0)      | 0 (0.0)          | 226 (90.0)      |
| Chloramphenicol               | CHL          | 16 (6.4)       | 4 (1.6)          | 231 (92.0)      |
| Amoxicillin/clavulanic acid   | AMC          | 8 (3.2)        | 8 (3.2)          | 235 (93.6)      |
| Cefpodoxime                   | CPD          | 7 (2.8)        | 0 (0.0)          | 244 (97.2)      |
| Nitrofurantoin                | NIT          | 7 (2.8)        | 32 (12.7)        | 212 (84.5)      |
| Cefovecin                     | CFN          | 7 (2.8)        | 2 (0.8)          | 242 (96.4)      |
| Ceftiofur                     | CEF          | 7 (2.8)        | 1 (0.4)          | 243 (96.8)      |
| Cephalexin                    | LEX          | 5 (2.0)        | 0 (0.0)          | 246 (98.0)      |
| Ceftazidime                   | CFZ          | 3 (1.2)        | 0 (0.0)          | 248 (98.8)      |
| Ciprofloxacin                 | CIP          | 0 (0.0)        | 3 (1.2)          | 248 (98.8)      |
| Enrofloxacin                  | EF           | 0 (0.0)        | 1 (0.4)          | 250 (99.6)      |
| Imipenem                      | IPM          | 0 (0.0)        | 0 (0.0)          | 251 (100.0)     |
| Amikacin                      | AMK          | 0 (0.0)        | 0 (0.0)          | 251 (100.0)     |
| Marbofloxacin                 | MAR          | 0 (0.0)        | 0 (0.0)          | 251 (100.0)     |

**Table S3. Antimicrobial resistance in 101 *Salmonella* isolates across 11 serovars and 11 animal species exhibiting resistance to at least one antimicrobial tested**

| <i>Salmonella</i><br>Serovars | Animal host species      |                            |                |                          |                            |                          |                          |                          |                |                |                          | Total<br>(%)               |
|-------------------------------|--------------------------|----------------------------|----------------|--------------------------|----------------------------|--------------------------|--------------------------|--------------------------|----------------|----------------|--------------------------|----------------------------|
|                               | Avian                    | Bovine                     | Canine         | Deer                     | Equine                     | Feline                   | Ilama                    | Ovine                    | Porcine        | Reptile        | Rhea                     |                            |
| Typhimurium                   | 1<br>(1.0)               | 28<br>(27.7)               | 5 (5.0)        | 1<br>(1.0)               | 15<br>(14.9)               | 0<br>(0.0)               | 0<br>(0.0)               | 0<br>(0.0)               | 0 (0.0)        | 0 (0.0)        | 0<br>(0.0)               | <b>50</b><br><b>(49.5)</b> |
| Dublin                        | 0<br>(0.0)               | 16<br>(15.8)               | 0 (0.0)        | 0<br>(0.0)               | 0 (0.0)                    | 0<br>(0.0)               | 0<br>(0.0)               | 0<br>(0.0)               | 0 (0.0)        | 0 (0.0)        | 0<br>(0.0)               | <b>16</b><br><b>(15.8)</b> |
| Agona                         | 0<br>(0.0)               | 1 (1.0)                    | 0 (0.0)        | 0<br>(0.0)               | 8 (7.9)                    | 0<br>(0.0)               | 0<br>(0.0)               | 0<br>(0.0)               | 0 (0.0)        | 0 (0.0)        | 0<br>(0.0)               | <b>9 (8.9)</b>             |
| Muenster                      | 0<br>(0.0)               | 0 (0.0)                    | 0 (0.0)        | 0<br>(0.0)               | 6 (5.9)                    | 0<br>(0.0)               | 0<br>(0.0)               | 0<br>(0.0)               | 0 (0.0)        | 0 (0.0)        | 0<br>(0.0)               | <b>6 (5.9)</b>             |
| Anatum                        | 0<br>(0.0)               | 1 (1.0)                    | 0 (0.0)        | 0<br>(0.0)               | 4 (4.0)                    | 0<br>(0.0)               | 0<br>(0.0)               | 0<br>(0.0)               | 0 (0.0)        | 0 (0.0)        | 0<br>(0.0)               | <b>5 (5.0)</b>             |
| Enteritidis                   | 0<br>(0.0)               | 1 (1.0)                    | 0 (0.0)        | 0<br>(0.0)               | 2 (2.0)                    | 0<br>(0.0)               | 0<br>(0.0)               | 2<br>(2.0)               | 0 (0.0)        | 0 (0.0)        | 0<br>(0.0)               | <b>5 (5.0)</b>             |
| Newport                       | 0<br>(0.0)               | 2 (2.0)                    | 0 (0.0)        | 0<br>(0.0)               | 2 (2.0)                    | 1<br>(1.0)               | 0<br>(0.0)               | 0<br>(0.0)               | 0 (0.0)        | 0 (0.0)        | 0<br>(0.0)               | <b>5 (5.0)</b>             |
| Mbandaka                      | 0<br>(0.0)               | 2 (2.0)                    | 0 (0.0)        | 0<br>(0.0)               | 0 (0.0)                    | 0<br>(0.0)               | 0<br>(0.0)               | 0<br>(0.0)               | 0 (0.0)        | 0 (0.0)        | 0<br>(0.0)               | <b>2 (2.0)</b>             |
| Choleraesuis                  | 0<br>(0.0)               | 0 (0.0)                    | 0 (0.0)        | 0<br>(0.0)               | 0 (0.0)                    | 0<br>(0.0)               | 0<br>(0.0)               | 0<br>(0.0)               | 1 (1.0)        | 0 (0.0)        | 0<br>(0.0)               | <b>1 (1.0)</b>             |
| Meleagridis                   | 0<br>(0.0)               | 1 (1.0)                    | 0 (0.0)        | 0<br>(0.0)               | 0 (0.0)                    | 0<br>(0.0)               | 0<br>(0.0)               | 0<br>(0.0)               | 0 (0.0)        | 0 (0.0)        | 0<br>(0.0)               | <b>1 (1.0)</b>             |
| Worthington                   | 0<br>(0.0)               | 0 (0.0)                    | 0 (0.0)        | 0<br>(0.0)               | 1 (1.0)                    | 0<br>(0.0)               | 0<br>(0.0)               | 0<br>(0.0)               | 0 (0.0)        | 0 (0.0)        | 0<br>(0.0)               | <b>1 (1.0)</b>             |
| <b>Total (%)</b>              | <b>1</b><br><b>(1.0)</b> | <b>52</b><br><b>(51.5)</b> | <b>5 (5.0)</b> | <b>1</b><br><b>(1.0)</b> | <b>38</b><br><b>(37.6)</b> | <b>1</b><br><b>(1.0)</b> | <b>0</b><br><b>(0.0)</b> | <b>2</b><br><b>(2.0)</b> | <b>1 (1.0)</b> | <b>0 (0.0)</b> | <b>0</b><br><b>(0.0)</b> | <b>101</b><br><b>(100)</b> |

**Table S4. Correlation between phenotype and genotype of *Salmonella* isolates (n=251)**

| Antimicrobials                      | Phenotypically resistance |                           | Phenotypically susceptible |                           | Kappa value (k) | PR (%)    | GR (%)    |
|-------------------------------------|---------------------------|---------------------------|----------------------------|---------------------------|-----------------|-----------|-----------|
|                                     | Genotypically resistance  | Genotypically susceptible | Genotypically resistance   | Genotypically susceptible |                 |           |           |
| Ampicillin (AMP)                    | 77                        | 2                         | 0                          | 172                       | 0.98            | 79 (31.5) | 77 (30.7) |
| Amoxicillin/clavulanic acid (AMC)   | 7                         | 1                         | 70                         | 173                       | 0.11            | 8 (3.2)   | 77 (30.7) |
| Cephalexin (LEX)                    | 3                         | 2                         | 0                          | 246                       | 0.74            | 5 (2.0)   | 3 (1.2)   |
| Cefpodoxime (CFD)                   | 3                         | 4                         | 0                          | 244                       | 0.59            | 7 (2.8)   | 3 (1.2)   |
| Cefovecin (CFN)                     | 3                         | 4                         | 0                          | 244                       | 0.59            | 7 (2.8)   | 3 (1.2)   |
| Ceftazidime (CFZ)                   | 3                         | 0                         | 0                          | 248                       | 1.00            | 3(1.2)    | 3 (1.2)   |
| Ceftiofur (CEF)                     | 3                         | 4                         | 0                          | 244                       | 0.59            | 7 (2.8)   | 3 (1.2)   |
| Gentamicin (GEN)                    | 32                        | 1                         | 3                          | 215                       | 0.93            | 33 (13.1) | 35 (13.9) |
| Doxycycline (DOX)                   | 64                        | 0                         | 3                          | 184                       | 0.96            | 64 (25.5) | 67 (26.7) |
| Chloramphenicol (CHL)               | 16                        | 0                         | 0                          | 235                       | 1.00            | 16 (6.4)  | 16 (6.4)  |
| Trimethoprim/sulfamethoxazole (SXT) | 25                        | 0                         | 2                          | 224                       | 0.95            | 25 (10.0) | 27 (10.8) |

PR and GR denote total phenotypic resistance and total genotypic resistance respectively
